# Supplementary material for: A Single-Session Process-Based Cognitive-Behavioural Interven-Tion for Chronic Pain Associated with Emotional Disorders
Source: Preprints.org preprint supplement (doi:10.20944/preprints202312.1957.v1), 2023-12-28
Supplement: Supplementary file 3 [file supplementary]

Archive with 2 entries (2 files):
- Figure 1.pdf
- Figure 2.pdf
