# Supplementary figures and images for: A Single-Session Process-Based Cognitive-Behavioural Interven-Tion for Chronic Pain Associated with Emotional Disorders
Source: Preprints.org preprint supplement (doi:10.20944/preprints202312.1957.v1), 2023-12-28

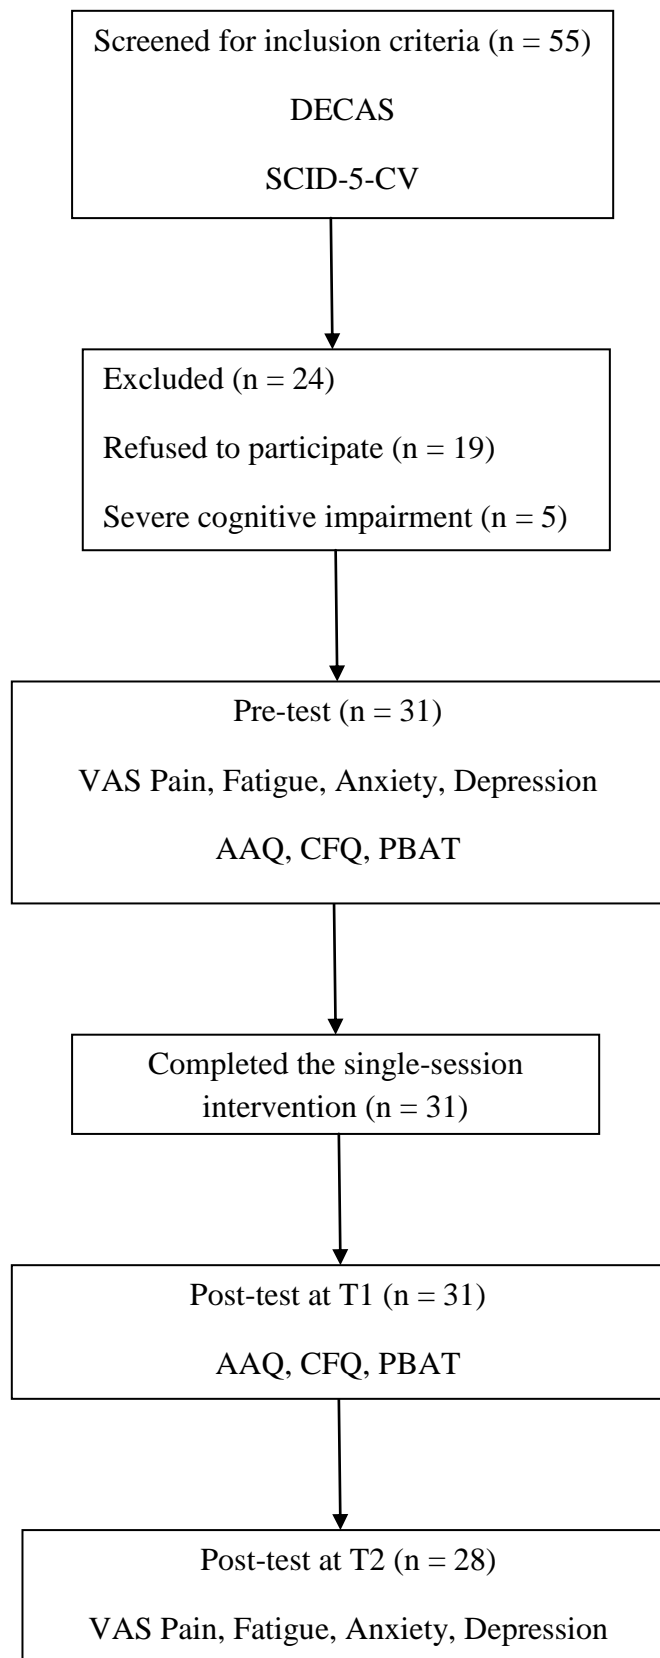

Supplement: Supplementary file 1 [file supplementary]
